# Supplementary material for: One-pot synthesis of Au@Pd/graphene nanostructures: electrocatalytic ethanol oxidation for direct alcohol fuel cells (DAFCs)
Source: Royal Society of Chemistry journal article supplement (doi:10.1039/c3ra40505b), 2013-01-01
Supplement: c3ra40505b.pdf [file c3ra40505b.pdf]

## Electronic Supplementary Information

# **One-pot Synthesis of Au@Pd/Graphene Nanostructures: Electrocatalytic Ethanol Oxidation for Direct Alcohol Fuel Cells (DAFCs)**

**Gyoung Hwa Jeong<sup>a</sup>, Donghyeuk Choi<sup>b</sup>, Meejae Kang<sup>b</sup>, Jinseon Shin<sup>2</sup>, Ji-goo Kang<sup>b</sup>, and Sang-Wook Kim<sup>a,b,\*</sup>**

Department of Molecular Science and Technology, Ajou University, Suwon 443-749, Korea,

\*Email: [swkim@ajou.ac.kr](mailto:swkim@ajou.ac.kr)

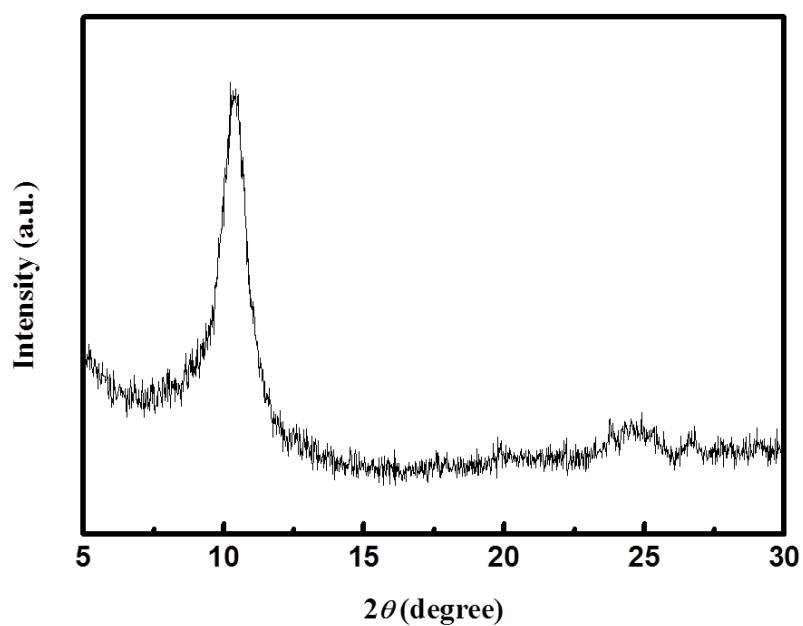

**Figure S1(a):** XRD peak of GO.

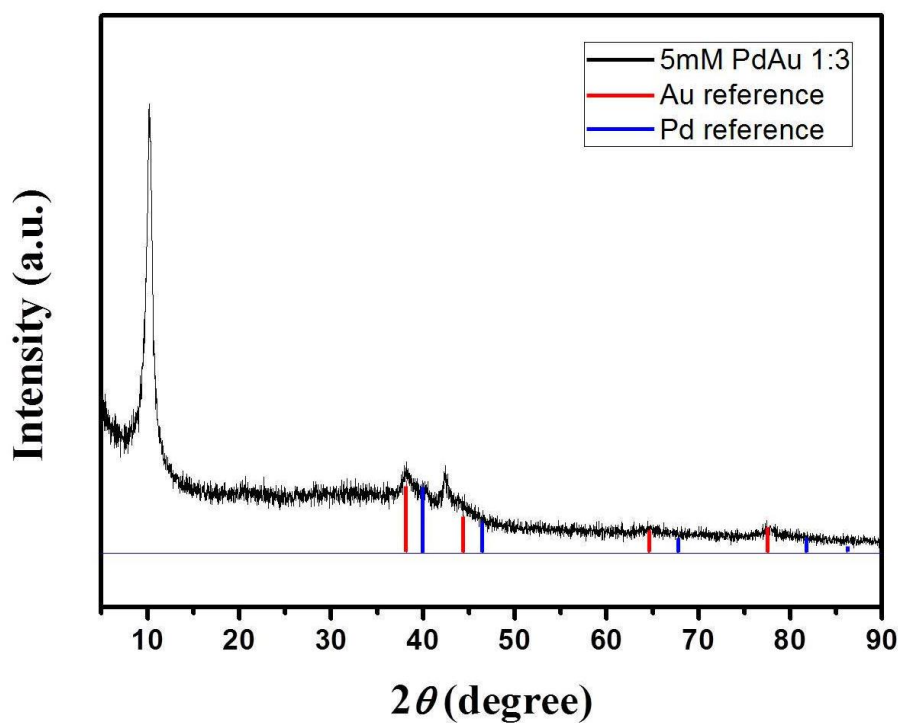

**Figure S2(b):** XRD peak of 5mM PdAu-RGO 1:3 at R.T.

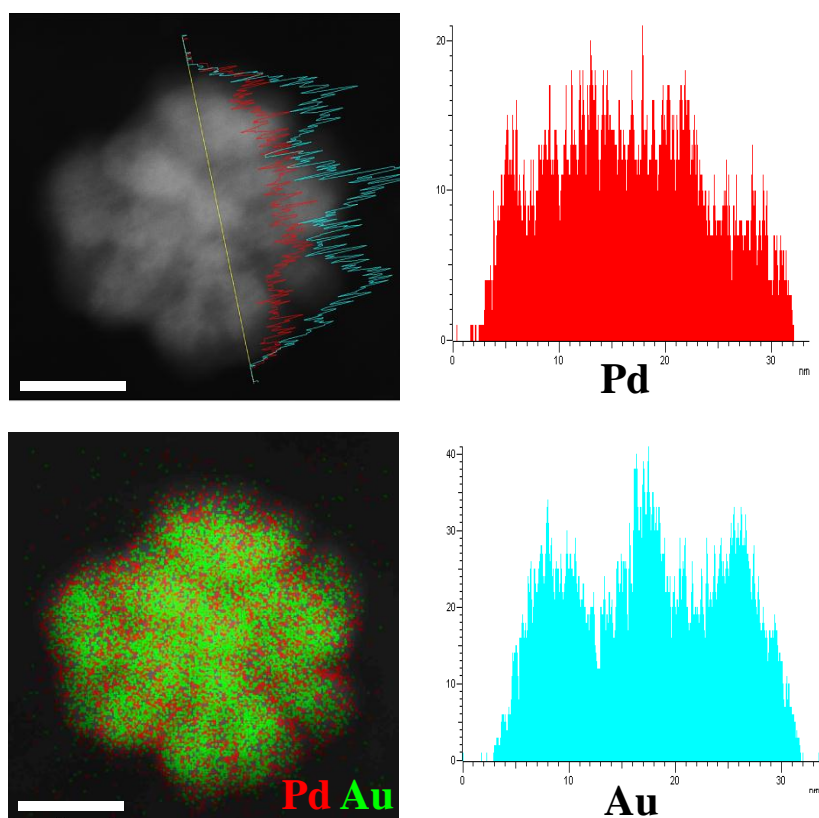

**Figure S2:** Line scanning image of 10mM PdAu(3:1)-RGO. (scale bars are 10nm)

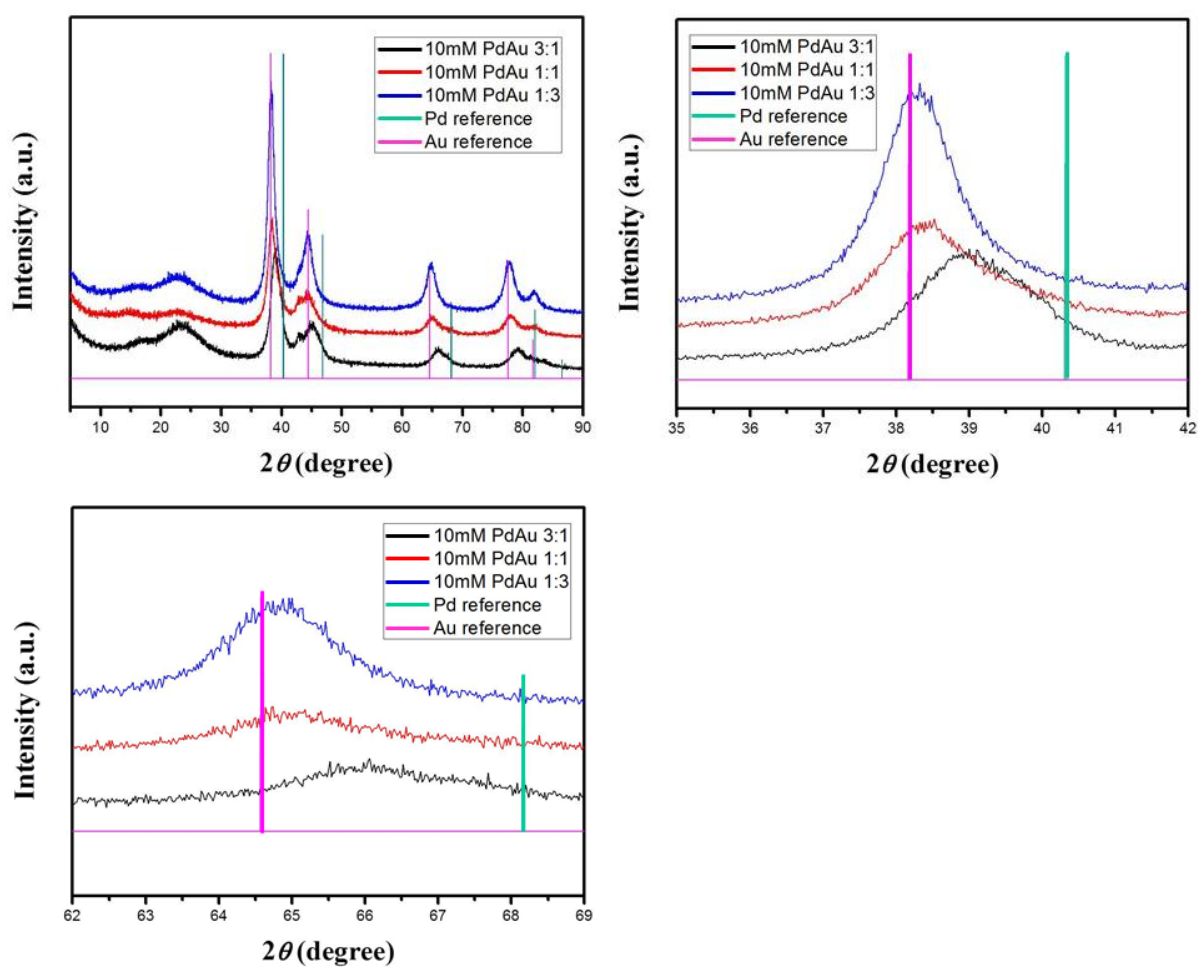

**Figure S3:** XRD peaks of 10mM PdAu-RGO.

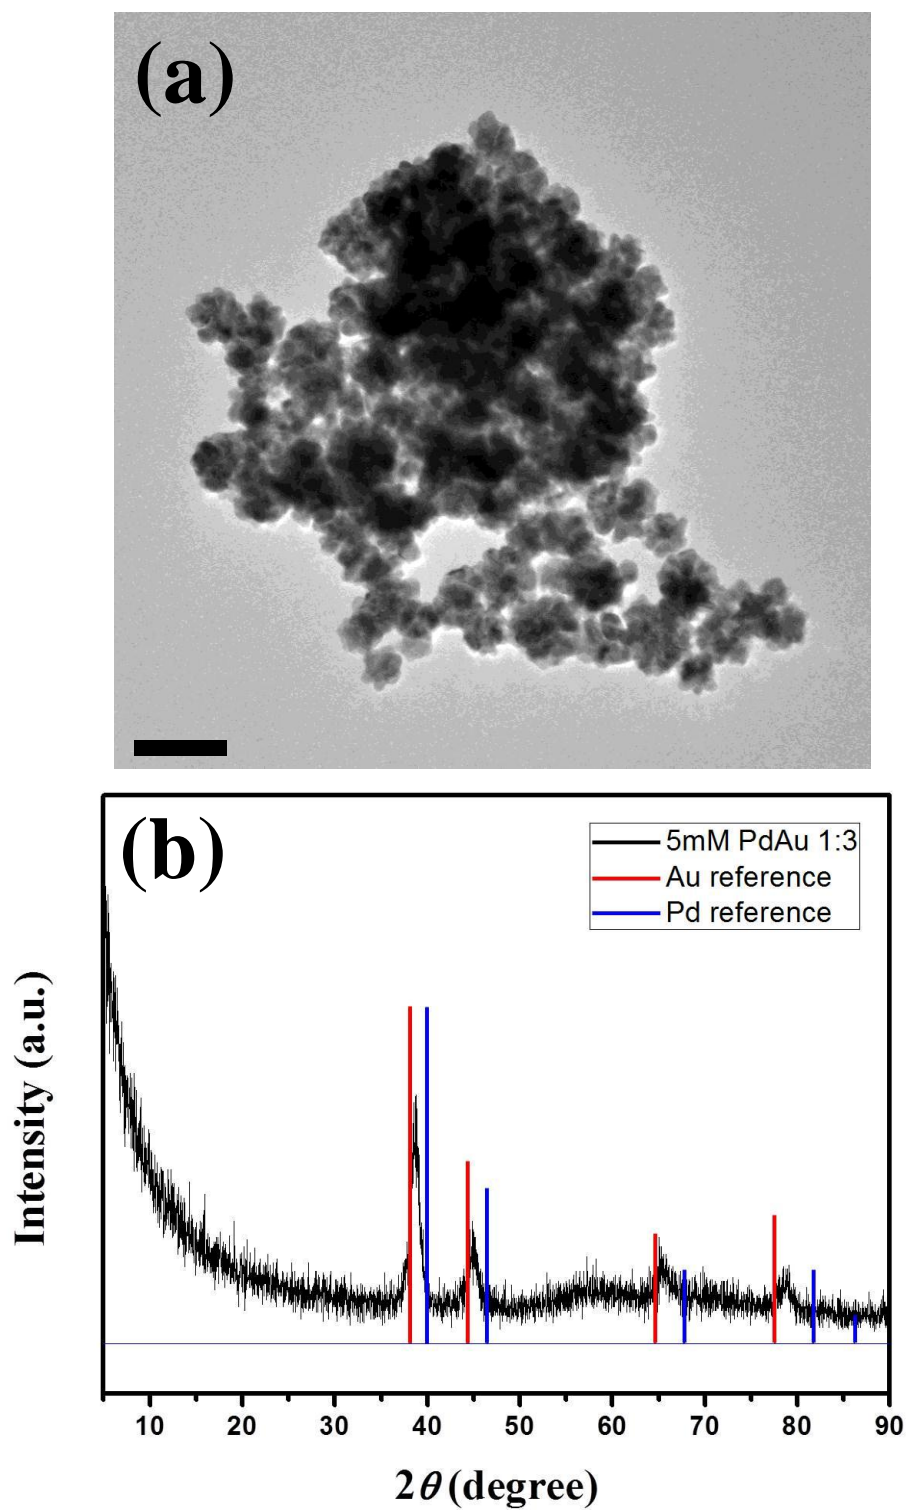

**Figure S4:** TEM image (a) and XRD peak (b) of 5mM PdAu 1:3 without GO. (scale bar is 50nm)

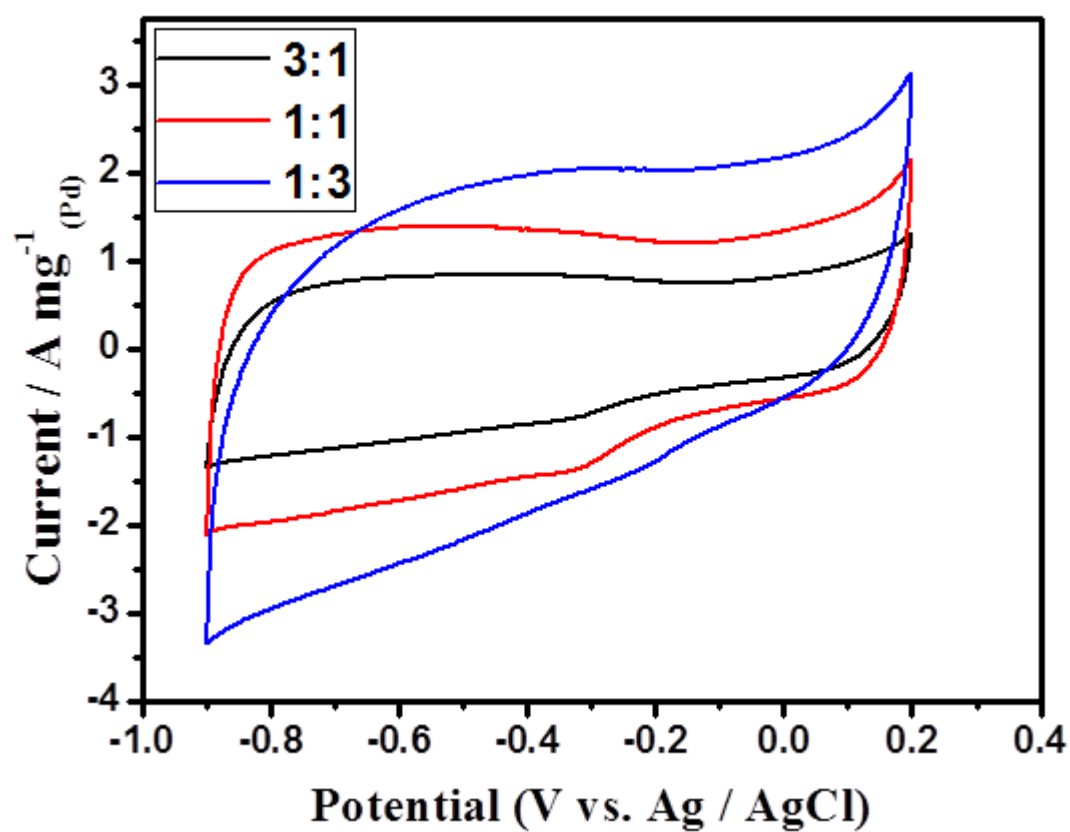

**Figure S5:** CV in 0.5 M NaOH. Scan rate is 50 mVs<sup>-1</sup>.
